# Supplementary material
Source: PubMed Central journal article supplement (PMC3071301)
Supplement: NIHMS260639-supplement-1.pdf [file NIHMS260639-supplement-1.pdf]

## ***TTC21B* contributes both causal and modifying alleles across the ciliopathy spectrum**

Erica E. Davis, Qi Zhang, Qin Liu, Bill H. Diplas, Lisa M. Davey, Jane Hartley, Corinne Stoetzel, Katarzyna Szymanska, Gokul Ramaswami, Clare V. Logan, Donna M. Muzny, Alice C. Young, David A. Wheeler, Pedro Cruz, Margaret Morgan, Lora R. Lewis, Praveen Cherukuri, Baishali Maskeri, Nancy F. Hansen, James C. Mullikin, Robert W. Blakesley, Gerard G. Bouffard, NISC Comparative Sequencing Program, Gabor Gyapay, Susanne Reiger, Burkhard Tönshoff, Ilse Kern, Neveen A. Soliman, Thomas J. Neuhaus, Kathryn J. Swoboda, Hulya Kayserili, Tomas E. Gallagher, Richard A. Lewis, Carsten Bergmann, Edgar A. Otto, Sophie Saunier, Peter J. Scambler, Philip L. Beales, Joseph G. Gleeson, Eamonn R. Maher, Tania Attié-Bitach, H el ene Dollfus, Colin A. Johnson, Eric D. Green, Richard A. Gibbs, Friedhelm Hildebrandt, Eric A. Pierce & Nicholas Katsanis

### **Supplementary Information:**

|                               | <b>Page</b> |
|-------------------------------|-------------|
| <b>Supplementary Table 1</b>  | <b>2</b>    |
| <b>Supplementary Table 2</b>  | <b>3</b>    |
| <b>Supplementary Table 3</b>  | <b>5</b>    |
| <b>Supplementary Table 4</b>  | <b>7</b>    |
| <b>Supplementary Table 5</b>  | <b>9</b>    |
| <b>Supplementary Table 6</b>  | <b>10</b>   |
| <b>Supplementary Table 7</b>  | <b>11</b>   |
| <b>Supplementary Table 8</b>  | <b>12</b>   |
| <b>Supplementary Table 9</b>  | <b>14</b>   |
| <br>                          |             |
| <b>Supplementary Figure 1</b> | <b>15</b>   |
| <b>Supplementary Figure 2</b> | <b>16</b>   |
| <b>Supplementary Figure 3</b> | <b>17</b>   |
| <b>Supplementary Figure 4</b> | <b>18</b>   |

**Supplementary Table 1. Collection sites and ethnicities of individuals sequenced at the *TTC21B* locus**

| Clinical Diagnosis      | Collection Location           | Ethnicity (n=) |                                 | Cohort Totals |
|-------------------------|-------------------------------|----------------|---------------------------------|---------------|
|                         |                               | N. European    | N. Africa/Middle East/ S.E.Asia |               |
| MKS                     | France <sup>1</sup>           | 27             | 22                              |               |
| MKS                     | United Kingdom <sup>2</sup>   | 30             | 44                              |               |
| Total MKS               |                               | 57             | 66                              | <b>123</b>    |
| JATD                    | United Kingdom <sup>3,4</sup> | 44             | 8                               |               |
| JATD                    | United States <sup>5</sup>    | 6              |                                 |               |
| Total JATD              |                               | 50             | 8                               | <b>58</b>     |
| BBS                     | France <sup>6</sup>           | 203            | 77                              |               |
| BBS                     | Germany <sup>7</sup>          | 10             |                                 |               |
| BBS                     | United States <sup>8</sup>    | 29             | 11                              |               |
| Total BBS               |                               | 242            | 88                              | <b>330</b>    |
| JBTS                    | United States <sup>9,10</sup> | 97             | 3                               | <b>100</b>    |
| NPHP+                   | United States <sup>10</sup>   | 29             | 7                               |               |
| NPHP                    | United States <sup>10</sup>   | 80             | 26                              |               |
| Total NPHP              |                               | 109            | 33                              | <b>142</b>    |
| <b>Total Ciliopathy</b> |                               | <b>555</b>     | <b>198</b>                      | <b>753</b>    |
| Controls                | United Kingdom <sup>2</sup>   |                | 96                              |               |
| Controls                | United States <sup>8</sup>    | 192            |                                 |               |
| CEU                     | United States <sup>11</sup>   | 28             |                                 |               |
| TSI                     | Italy <sup>11</sup>           |                | 21                              |               |
| YRI                     | Nigeria <sup>11</sup>         |                | 34                              |               |
| GIH                     | United States <sup>11</sup>   |                | 27                              |               |
| <b>Total Controls</b>   |                               | <b>220</b>     | <b>178</b>                      | <b>398</b>    |

MKS, Meckel-Gruber Syndrome; JATD, Jeune Asphyxiating Thoracic Dystrophy; BBS, Bardet-Biedl Syndrome; JBTS, Joubert Syndrome; SLS, Senior-Loken Syndrome; NPHP, isolated Nephronophthisis; NPHP+, NPHP with extrarenal phenotypes.

<sup>1</sup>Hôpital Necker-Enfants Malades, Paris, France; <sup>2</sup>St. James's University Hospital, Leeds, UK; <sup>3</sup>University College London, London, UK; <sup>4</sup>University of Birmingham, Birmingham, UK; <sup>5</sup>Johns Hopkins University, Baltimore, MD, USA; <sup>6</sup>Université Louis Pasteur, Strasbourg, France; <sup>7</sup>University of Aachen, Aachen, Germany; <sup>8</sup>Baylor College of Medicine, Houston, TX, USA; <sup>9</sup>University of California, San Diego, La Jolla, CA, USA; <sup>10</sup>University of Michigan, Ann Arbor, MI, USA <sup>11</sup>NHGRI Collection/International HapMap Project.

**Supplementary Table 2. Summary of *TTC21B* variant pathogenicity.**

| <i>TTC21B</i> Variant | Variant counts/Cohort      |                          |                         |                        | Functional Assessment    |                        |                                   |                              |                                     |                              | Overall pathogenicity**                                                                                                                          |
|-----------------------|----------------------------|--------------------------|-------------------------|------------------------|--------------------------|------------------------|-----------------------------------|------------------------------|-------------------------------------|------------------------------|--------------------------------------------------------------------------------------------------------------------------------------------------|
|                       | N. Eur Ciliopathy (n=1110) | Other Ciliopathy (n=396) | N. Eur Controls (n=440) | Other Controls (n=356) | Zebrafish <i>in vivo</i> | Zebrafish morphometric | <i>In vitro</i> cilia measurement | <i>In vitro</i> localization | <i>In vivo</i> retinal localization | Western-level relative to WT |                                                                                                                                                  |
| <i>Nonsense</i>       |                            |                          |                         |                        |                          |                        |                                   |                              |                                     |                              |                                                                                                                                                  |
| K31fsX48              | 1*                         | -                        | -                       | -                      | ND                       | ND                     | ND                                | ND                           | ND                                  | ND                           | Null- PTC                                                                                                                                        |
| R411X                 | 1*                         | -                        | -                       | -                      | ND                       | ND                     | ND                                | ND                           | ND                                  | ND                           | Null- PTC                                                                                                                                        |
| F440fsX443            | 1*                         | -                        | -                       | -                      | ND                       | ND                     | ND                                | ND                           | ND                                  | ND                           | Null- PTC                                                                                                                                        |
| C552X                 | -                          | 1                        | -                       | -                      | ND                       | ND                     | ND                                | ND                           | ND                                  | ND                           | Null- PTC                                                                                                                                        |
| <i>Splice</i>         |                            |                          |                         |                        |                          |                        |                                   |                              |                                     |                              |                                                                                                                                                  |
| c.711G>T              | 1*                         | -                        | -                       | -                      | ND                       | ND                     | ND                                | ND                           | ND                                  | ND                           | Null- predicted splice mutation-PTC<br>Null- predicted Δ2 TPR domains<br>Null- predicted Δ partial TPR domain<br>Null- predicted Δ54 amino acids |
| c.2322+3A>G           | 3*                         | -                        | -                       | -                      | ND                       | ND                     | ND                                | ND                           | ND                                  | ND                           |                                                                                                                                                  |
| c.2758-2A>G           | -                          | 1                        | -                       | -                      | ND                       | ND                     | ND                                | ND                           | ND                                  | ND                           |                                                                                                                                                  |
| c.3264-3C>G           | 1*                         | -                        | -                       | -                      | ND                       | ND                     | ND                                | ND                           | ND                                  | ND                           |                                                                                                                                                  |
| <i>Novel Missense</i> |                            |                          |                         |                        |                          |                        |                                   |                              |                                     |                              |                                                                                                                                                  |
| F60Y                  | 1*                         | -                        | -                       | -                      | hypomorph                | ND                     | ND                                | ND                           | ND                                  | ND                           | Hypomorph                                                                                                                                        |
| K66R                  | -                          | -                        | -                       | 1                      | benign                   | ND                     | ND                                | ND                           | ND                                  | ND                           | Benign                                                                                                                                           |
| W150R                 | 1*                         | -                        | -                       | -                      | null                     | ND                     | ND                                | ND                           | ND                                  | ND                           | Null                                                                                                                                             |
| K157E                 | 1*                         | -                        | -                       | -                      | hypomorph                | benign                 | hypomorph                         | undetected                   | ND                                  | ND                           | Hypomorph                                                                                                                                        |
| P209L                 | -                          | 7^                       | -                       | -                      | hypomorph                | pathogenic             | hypomorph                         | mislocalized                 | mislocalized                        | decreased                    | Hypomorph                                                                                                                                        |
| Q222L                 | 1*                         | -                        | -                       | 4                      | hypomorph                | pathogenic             | hypomorph                         | undetected                   | ND                                  | ND                           | Hypomorph                                                                                                                                        |
| T231S                 | 3*                         | 5                        | -                       | -                      | hypomorph                | pathogenic             | hypomorph                         | normal                       | ND                                  | decreased                    | Hypomorph                                                                                                                                        |
| D242N                 | 6                          | 4                        | 4                       | 1                      | benign                   | ND                     | ND                                | ND                           | ND                                  | ND                           | Benign                                                                                                                                           |
| Y255C                 | 1*                         | -                        | -                       | -                      | hypomorph                | pathogenic             | hypomorph                         | normal                       | ND                                  | decreased                    | Hypomorph                                                                                                                                        |
| M280V                 | 1*                         | -                        | -                       | 4                      | null                     | pathogenic             | null                              | normal                       | ND                                  | decreased                    | Null                                                                                                                                             |
| A327S                 | -                          | 1                        | -                       | -                      | hypomorph                | pathogenic             | hypomorph                         | normal                       | ND                                  | decreased                    | Hypomorph                                                                                                                                        |
| Y347C                 | -                          | 1                        | -                       | -                      | hypomorph                | pathogenic             | hypomorph                         | mislocalized                 | ND                                  | normal                       | Hypomorph                                                                                                                                        |
| R411G                 | -                          | 1                        | -                       | 1                      | hypomorph                | pathogenic             | hypomorph                         | mislocalized                 | mislocalized                        | decreased                    | Hypomorph                                                                                                                                        |
| Q412R                 | -                          | -                        | -                       | 1                      | benign                   | ND                     | ND                                | ND                           | ND                                  | ND                           | Benign                                                                                                                                           |
| D424E                 | -                          | -                        | -                       | 1                      | benign                   | ND                     | ND                                | ND                           | ND                                  | ND                           | Benign                                                                                                                                           |
| H566R                 | 1*                         | -                        | -                       | -                      | null                     | ND                     | ND                                | ND                           | ND                                  | ND                           | Null                                                                                                                                             |
| S591N                 | 1*                         | -                        | -                       | -                      | hypomorph                | pathogenic             | hypomorph                         | mislocalized                 | ND                                  | decreased                    | Hypomorph                                                                                                                                        |
| R616C                 | 1                          | 9                        | 2                       | 6                      | benign                   | ND                     | ND                                | ND                           | ND                                  | ND                           | Benign                                                                                                                                           |
| I624V                 | -                          | -                        | -                       | 1                      | benign                   | ND                     | ND                                | ND                           | ND                                  | ND                           | Benign                                                                                                                                           |
| H645R                 | -                          | -                        | 1                       | -                      | benign                   | ND                     | ND                                | ND                           | ND                                  | ND                           | Benign                                                                                                                                           |
| S724T                 | 1                          | -                        | -                       | -                      | benign                   | ND                     | ND                                | ND                           | ND                                  | ND                           | Benign                                                                                                                                           |
| P753L                 | -                          | 2                        | -                       | 5                      | null                     | pathogenic             | null                              | normal                       | ND                                  | increased                    | Null                                                                                                                                             |
| D755Y                 | -                          | 1                        | -                       | -                      | null                     | ND                     | ND                                | ND                           | ND                                  | ND                           | Null                                                                                                                                             |
| L795P                 | 1*                         | -                        | -                       | -                      | hypomorph                | pathogenic             | hypomorph                         | normal                       | ND                                  | normal                       | Hypomorph                                                                                                                                        |
| M844V                 | -                          | 1                        | -                       | -                      | null                     | ND                     | ND                                | ND                           | ND                                  | ND                           | Null                                                                                                                                             |
| R867C                 | -                          | 1                        | -                       | -                      | null                     | ND                     | ND                                | ND                           | ND                                  | ND                           | Null                                                                                                                                             |
| R867H                 | 1*                         | -                        | -                       | 1                      | null                     | ND                     | ND                                | ND                           | ND                                  | ND                           | Null                                                                                                                                             |
| Q869R                 | 1*                         | -                        | -                       | -                      | hypomorph                | ND                     | ND                                | ND                           | ND                                  | ND                           | Hypomorph                                                                                                                                        |
| R939Q                 | -                          | -                        | -                       | 1                      | hypomorph                | ND                     | ND                                | ND                           | ND                                  | ND                           | Hypomorph                                                                                                                                        |

|                        |     |    |     |    |           |            |           |              |              |            |           |
|------------------------|-----|----|-----|----|-----------|------------|-----------|--------------|--------------|------------|-----------|
| R939W                  | -   | -  | 2*  | -  | null      | pathogenic | null      | normal       | ND           | decreased  | Null      |
| L1002V                 | 5*  | -  | 2*  | 1  | hypomorph | ND         | hypomorph | ND           | mislocalized | decreased  | Hypomorph |
| M1011V                 | -   | -  | -   | 1  | benign    | ND         | ND        | ND           | ND           | ND         | Benign    |
| Y1035C                 | -   | -  | -   | 2  | benign    | ND         | ND        | ND           | ND           | ND         | Benign    |
| D1041N                 | -   | 1  | -   | -  | null      | ND         | hypomorph | mislocalized | mislocalized | increased  | Null      |
| T1103R                 | 1*  | -  | -   | -  | hypomorph | pathogenic | hypomorph | mislocalized | mislocalized | normal     | Hypomorph |
| Y1167C                 | -   | 1  | -   | -  | hypomorph | ND         | ND        | ND           | ND           | ND         | Hypomorph |
| M1186V                 | -   | 1  | -   | -  | hypomorph | ND         | ND        | ND           | ND           | ND         | Hypomorph |
| I1208S                 | -   | 1  | -   | -  | null      | pathogenic | null      | undetected   | undetected   | undetected | Null      |
| D1284H                 | -   | -  | -   | 1  | hypomorph | ND         | ND        | ND           | ND           | ND         | Hypomorph |
| R1311G                 | 2   | -  | 1   | -  | benign    | ND         | ND        | ND           | ND           | ND         | Benign    |
| <i>HapMap Variants</i> |     |    |     |    |           |            |           |              |              |            |           |
| M210V (rs1432273)      | 306 | 70 | 141 | 67 | benign    | ND         | ND        | ND           | ND           | ND         | Benign    |
| A276T (rs7592429)      | 2   | 43 | 1   | 28 | benign    | ND         | ND        | ND           | ND           | ND         | Benign    |
| P463S (rs16851307)     | -   | 1  | -   | 1  | benign    | ND         | ND        | ND           | ND           | ND         | Benign    |
| L473F (rs2163649)      | -   | 1  | -   | -  | benign    | ND         | ND        | ND           | ND           | ND         | Benign    |

\* Pathogenic variants counted in genetic association studies. ^Likely founder allele. TPR, tetratricopeptide repeat; ND, not done; PTC, premature termination codon.

\*\* Overall pathogenicity is based on *in vivo* zebrafish scoring, which is in agreement with at least one other functional assay for 17/17 variants.

**Supplementary Table 3. *In vivo* rescue efficiency of *ttc21b* morphant phenotypes with *TTC21B* mRNA**

| <i>TTC21B</i> Variant | Cohort |       | Injection                | Embryo counts |         |          |     | vs. WT rescue |         | vs. MO alone |         | Pathogenicity<br><i>in vivo</i> call*** |
|-----------------------|--------|-------|--------------------------|---------------|---------|----------|-----|---------------|---------|--------------|---------|-----------------------------------------|
|                       | Case   | Cntrl |                          | Normal        | Class I | Class II | n=  | effect*       | P-val** | effect*      | P-val** |                                         |
|                       |        |       | Controls                 | 225           | 21      | 0        | 246 |               |         |              |         |                                         |
|                       |        |       | 10ng MO                  | 79            | 62      | 35       | 176 |               |         |              |         |                                         |
| WT                    |        |       | 10ng MO + 50pg WT RNA    | 139           | 29      | 17       | 185 |               |         |              | <0.0001 |                                         |
| F60Y                  | X      |       | 10ng MO + 50pg F60Y RNA  | 66            | 17      | 24       | 107 | -             | <0.0001 | +            | 0.0002  | hypomorph                               |
| K66R                  |        | X     | 10ng MO + 50pg K66R RNA  | 72            | 17      | 13       | 102 | NS            | 0.3636  | +            | <0.0001 | benign                                  |
| W150R                 | X      |       | 10ng MO + 50pg W150R RNA | 64            | 39      | 30       | 133 | -             | <0.0001 | NS           | 0.432   | null                                    |
| K157E                 | X      |       | 10ng MO + 50pg K157E RNA | 74            | 27      | 7        | 108 | -             | 0.038   | +            | <0.0001 | hypomorph                               |
| M201V (rs1432273)     | X      | X     | 10ng MO + 50pg M201V RNA | 87            | 22      | 8        | 117 | NS            | 0.6004  | +            | <0.0001 | benign                                  |
| P209L                 | X      |       | 10ng MO + 50pg P209L RNA | 48            | 21      | 8        | 77  | -             | 0.0067  | +            | 0.0012  | hypomorph                               |
| Q222L                 | X      | X     | 10ng MO + 50pg Q222L RNA | 61            | 29      | 10       | 100 | -             | 0.0013  | +            | 0.0029  | hypomorph                               |
| T231S                 | X      |       | 10ng MO + 50pg T231S RNA | 57            | 32      | 6        | 95  | -             | <0.0001 | +            | 0.0006  | hypomorph                               |
| D242N                 | X      | X     | 10ng MO + 50pg D242N RNA | 83            | 26      | 1        | 110 | +             | 0.0039  | +            | <0.0001 | benign                                  |
| Y255C                 | X      |       | 10ng MO + 50pg Y255C RNA | 62            | 41      | 10       | 113 | -             | <0.0001 | +            | 0.0158  | hypomorph                               |
| A276T (rs7592429)     | X      | X     | 10ng MO + 50pg A276T RNA | 78            | 11      | 6        | 95  | NS            | 0.2654  | +            | <0.0001 | benign                                  |
| M280V                 | X      | X     | 10ng MO + 50pg M280V RNA | 68            | 38      | 30       | 136 | -             | <0.0001 | NS           | 0.3404  | null                                    |
| A327S                 | X      |       | 10ng MO + 50pg A327S RNA | 75            | 29      | 21       | 125 | -             | 0.0014  | +            | 0.0084  | hypomorph                               |
| Y347C                 | X      |       | 10ng MO + 50pg Y347C RNA | 72            | 34      | 12       | 118 | -             | 0.0013  | +            | 0.0029  | hypomorph                               |
| R411G                 | X      | X     | 10ng MO + 50pg R411G RNA | 71            | 44      | 12       | 127 | -             | <0.0001 | +            | 0.0127  | hypomorph                               |
| Q412R                 |        | X     | 10ng MO + 50pg Q412R RNA | 77            | 9       | 8        | 94  | NS            | 0.2387  | +            | <0.0001 | benign                                  |
| D424E                 |        | X     | 10ng MO + 50pg D424E RNA | 67            | 9       | 7        | 83  | NS            | 0.3407  | +            | <0.0001 | benign                                  |
| P463S (rs16851307)    | X      | X     | 10ng MO + 50pg P463S RNA | 68            | 12      | 10       | 90  | NS            | 0.6004  | +            | <0.0001 | benign                                  |
| L473F (rs2163649)     | X      | X     | 10ng MO + 50pg L473F RNA | 74            | 10      | 2        | 86  | +             | 0.0178  | +            | <0.0001 | benign                                  |
| H566R                 | X      |       | 10ng MO + 50pg H566R RNA | 32            | 17      | 33       | 82  | -             | <0.0001 | -            | <0.0001 | null                                    |
| S591N                 | X      |       | 10ng MO + 50pg S591N RNA | 116           | 45      | 19       | 180 | -             | 0.0284  | +            | 0.0006  | hypomorph                               |
| R616C                 | X      | X     | 10ng MO + 50pg R616C RNA | 91            | 16      | 3        | 110 | NS            | 0.0882  | +            | <0.0001 | benign                                  |
| I624V                 |        | X     | 10ng MO + 50pg I624V RNA | 72            | 12      | 3        | 87  | NS            | 0.078   | +            | <0.0001 | benign                                  |
| H645R                 |        | X     | 10ng MO + 50pg H645R RNA | 92            | 13      | 5        | 110 | NS            | 0.1627  | +            | <0.0001 | benign                                  |
| S724T                 | X      |       | 10ng MO + 50pg S724T RNA | 63            | 15      | 10       | 88  | NS            | 0.7309  | +            | <0.0001 | benign                                  |
| P753L                 | X      | X     | 10ng MO + 50pg P753L RNA | 46            | 44      | 23       | 113 | -             | <0.0001 | NS           | 0.6661  | null                                    |
| D755Y                 | X      |       | 10ng MO + 50pg D755Y RNA | 42            | 11      | 26       | 79  | -             | <0.0001 | -            | <0.0001 | null                                    |
| L795P                 | X      |       | 10ng MO + 50pg L795P RNA | 63            | 23      | 14       | 100 | -             | 0.0206  | +            | 0.0014  | hypomorph                               |
| M844V                 | X      |       | 10ng MO + 50pg M844V RNA | 74            | 40      | 44       | 158 | -             | <0.0001 | -            | 0.0463  | null                                    |
| R867C                 | X      |       | 10ng MO + 50pg R867C RNA | 68            | 37      | 49       | 154 | -             | <0.0001 | -            | 0.0048  | null                                    |
| R867H                 | X      | X     | 10ng MO + 50pg R867H RNA | 64            | 29      | 30       | 123 | -             | <0.0001 | NS           | 0.069   | null                                    |
| Q869R                 | X      |       | 10ng MO + 50pg Q869R RNA | 77            | 28      | 16       | 121 | -             | 0.0397  | +            | 0.0007  | hypomorph                               |
| R939Q                 |        | X     | 10ng MO + 50pg R939Q RNA | 52            | 18      | 20       | 90  | -             | <0.0001 | +            | 0.0056  | hypomorph                               |
| R939W                 |        | X     | 10ng MO + 50pg R939W RNA | 33            | 26      | 17       | 76  | -             | <0.0001 | NS           | 0.8562  | null                                    |

|        |   |   |                           |     |    |    |     |    |         |    |         |           |
|--------|---|---|---------------------------|-----|----|----|-----|----|---------|----|---------|-----------|
| L1002V | X | X | 10ng MO + 50pg L1002V RNA | 51  | 26 | 6  | 83  | -  | 0.0002  | +  | 0.0006  | hypomorph |
| M1011V |   | X | 10ng MO + 50pg M1011V RNA | 100 | 13 | 10 | 123 | NS | 0.3407  | +  | <0.0001 | benign    |
| Y1035C |   | X | 10ng MO + 50pg Y1035C RNA | 71  | 19 | 9  | 99  | NS | 0.6792  | +  | 0.0001  | benign    |
| D1041N | X |   | 10ng MO + 50pg D1041N RNA | 39  | 17 | 15 | 71  | -  | <0.0001 | NS | 0.057   | null      |
| T1103R | X |   | 10ng MO + 50pg T1103R RNA | 65  | 38 | 14 | 117 | -  | <0.0001 | +  | 0.0463  | hypomorph |
| Y1167C | X |   | 10ng MO + 50pg Y1167C RNA | 49  | 15 | 22 | 86  | -  | <0.0001 | +  | 0.0008  | hypomorph |
| M1186V | X |   | 10ng MO + 50pg M1186V RNA | 51  | 19 | 22 | 92  | -  | <0.0001 | +  | 0.0134  | hypomorph |
| I1208S | X |   | 10ng MO + 50pg I1208S RNA | 48  | 38 | 39 | 125 | -  | <0.0001 | -  | 0.019   | null      |
| D1284H |   | X | 10ng MO + 50pg D1284H RNA | 78  | 16 | 18 | 112 | -  | 0.0491  | +  | <0.0001 | hypomorph |
| R1311G | X | X | 10ng MO + 50pg R1311G RNA | 55  | 11 | 12 | 78  | NS | 0.1073  | +  | <0.0001 | benign    |

\* indicates effect of test injection vs. WT rescue or MO alone. "NS", not significantly different; "+," ameliorated phenotype; "-", exacerbated phenotype

\*\* P-value for  $\chi^2$  test; p<0.05 is considered significant

\*\*\* benign- significantly ameliorated in comparison to MO alone and either improved or not significantly different from WT rescue; hypomorph- significantly exacerbated in comparison to WT rescue, but significantly ameliorated in comparison to MO alone; null- significantly exacerbated in comparison to WT rescue, but not significantly different or exacerbated in comparison to MO alone.

**Supplementary Table 4. *In vivo* phenotypic data for *TTC21B* mRNA injected alone**

| <i>TTC21B</i> Variant | Cohort |       | Injection       | Embryo counts |         |          |     | versus WT mRNA |         | versus MO alone |         |
|-----------------------|--------|-------|-----------------|---------------|---------|----------|-----|----------------|---------|-----------------|---------|
|                       | Case   | Cntrl |                 | Normal        | Class I | Class II | n=  | effect*        | P-val** | effect*         | P-val** |
|                       |        |       | Controls        | 225           | 21      | 0        | 246 |                |         |                 |         |
|                       |        |       | 10ng MO         | 79            | 62      | 35       | 176 |                |         |                 |         |
| WT                    |        |       | 50pg WT RNA     | 68            | 10      | 3        | 81  |                |         | +               | <0.0001 |
| F60Y                  | X      |       | 50pg F60Y RNA   | 102           | 14      | 2        | 118 | NS             | 0.5923  | +               | <0.0001 |
| K66R                  |        | X     | 50pg K66R RNA   | 78            | 16      | 3        | 97  | NS             | 0.4103  | +               | <0.0001 |
| W150R                 | X      |       | 50pg W150R RNA  | 77            | 15      | 4        | 96  | NS             | 0.4668  | +               | <0.0001 |
| K157E                 | X      |       | 50pg K157E RNA  | 104           | 12      | 1        | 117 | NS             | 0.2368  | +               | <0.0001 |
| M201V (rs1432273)     | X      | X     | 50pg M201V RNA  | 112           | 12      | 2        | 126 | NS             | 0.4482  | +               | <0.0001 |
| P209L                 | X      |       | 50pg P209L RNA  | 68            | 10      | 2        | 80  | NS             | 0.8471  | +               | <0.0001 |
| Q222L                 | X      | X     | 50pg Q222L RNA  | 70            | 10      | 6        | 86  | NS             | 0.3077  | +               | <0.0001 |
| T231S                 | X      |       | 50pg T231S RNA  | 98            | 10      | 4        | 112 | NS             | 0.6309  | +               | <0.0001 |
| D242N                 | X      | X     | 50pg D242N RNA  | 110           | 18      | 1        | 129 | NS             | 0.2732  | +               | <0.0001 |
| Y255C                 | X      |       | 50pg Y255C RNA  | 92            | 16      | 6        | 114 | NS             | 0.7081  | +               | <0.0001 |
| A276T (rs7592429)     | X      | X     | 50pg A276T RNA  | 112           | 10      | 4        | 126 | NS             | 0.3904  | +               | <0.0001 |
| M280V                 | X      | X     | 50pg M280V RNA  | 80            | 9       | 6        | 95  | NS             | 0.4153  | +               | <0.0001 |
| A327S                 | X      |       | 50pg A327S RNA  | 70            | 5       | 4        | 79  | NS             | 0.1697  | +               | <0.0001 |
| Y347C                 | X      |       | 50pg Y347C RNA  | 108           | 6       | 4        | 118 | NS             | 0.0783  | +               | <0.0001 |
| R411G                 | X      | X     | 50pg R411G RNA  | 108           | 21      | 4        | 133 | NS             | 0.4295  | +               | <0.0001 |
| Q412R                 |        | X     | 50pg Q412R RNA  | 68            | 9       | 6        | 83  | NS             | 0.3041  | +               | <0.0001 |
| D424E                 |        | X     | 50pg D424E RNA  | 74            | 10      | 3        | 87  | NS             | 0.8442  | +               | <0.0001 |
| P463S (rs16851307)    | X      | X     | 50pg P463S RNA  | 84            | 6       | 1        | 91  | NS             | 0.0783  | +               | <0.0001 |
| L473F (rs2163649)     | X      | X     | 50pg L473F RNA  | 94            | 8       | 1        | 103 | NS             | 0.1245  | +               | <0.0001 |
| H566R                 | X      |       | 50pg H566R RNA  | 55            | 10      | 2        | 67  | NS             | 0.5923  | +               | <0.0001 |
| S591N                 | X      |       | 50pg S591N RNA  | 112           | 10      | 2        | 124 | NS             | 0.2513  | +               | <0.0001 |
| R616C                 | X      | X     | 50pg R616C RNA  | 109           | 8       | 2        | 119 | NS             | 0.1498  | +               | <0.0001 |
| I624V                 |        | X     | 50pg I624V RNA  | 75            | 9       | 5        | 89  | NS             | 0.5134  | +               | <0.0001 |
| H645R                 |        | X     | 50pg H645R RNA  | 88            | 12      | 6        | 106 | NS             | 0.5783  | +               | <0.0001 |
| S724T                 | X      |       | 50pg S724T RNA  | 78            | 6       | 1        | 85  | NS             | 0.0783  | +               | <0.0001 |
| P753L                 | X      | X     | 50pg P753L RNA  | 56            | 4       | 2        | 62  | NS             | 0.1568  | +               | <0.0001 |
| D755Y                 | X      |       | 50pg D755Y RNA  | 67            | 7       | 2        | 76  | NS             | 0.5514  | +               | <0.0001 |
| L795P                 | X      |       | 50pg L795P RNA  | 104           | 8       | 4        | 116 | NS             | 0.2513  | +               | <0.0001 |
| M844V                 | X      |       | 50pg M844V RNA  | 64            | 7       | 5        | 76  | NS             | 0.2231  | +               | <0.0001 |
| R867C                 | X      |       | 50pg R867C RNA  | 66            | 5       | 2        | 73  | NS             | 0.8471  | +               | <0.0001 |
| R867H                 | X      | X     | 50pg R867H RNA  | 58            | 9       | 4        | 71  | NS             | 0.5741  | +               | <0.0001 |
| Q869R                 | X      |       | 50pg Q869R RNA  | 92            | 6       | 5        | 103 | NS             | 0.1697  | +               | <0.0001 |
| R939Q                 |        | X     | 50pg R939Q RNA  | 74            | 12      | 6        | 92  | NS             | 0.2831  | +               | <0.0001 |
| R939W                 |        | X     | 50pg R939W RNA  | 90            | 18      | 6        | 114 | NS             | 0.3904  | +               | <0.0001 |
| L1002V                | X      | X     | 50pg L1002V RNA | 68            | 5       | 2        | 75  | NS             | 0.2372  | +               | <0.0001 |

|        |   |   |                 |    |    |   |     |    |        |   |         |
|--------|---|---|-----------------|----|----|---|-----|----|--------|---|---------|
| M1011V |   | X | 50pg M1011V RNA | 92 | 10 | 4 | 106 | NS | 0.6514 | + | <0.0001 |
| Y1035C |   | X | 50pg Y1035C RNA | 72 | 11 | 5 | 88  | NS | 0.5741 | + | <0.0001 |
| D1041N | X |   | 50pg D1041N RNA | 80 | 17 | 7 | 104 | NS | 0.1379 | + | <0.0001 |
| T1103R | X |   | 50pg T1103R RNA | 92 | 19 | 4 | 115 | NS | 0.1245 | + | <0.0001 |
| Y1167C | X |   | 50pg Y1167C RNA | 90 | 12 | 8 | 110 | NS | 0.3041 | + | <0.0001 |
| M1186V | X |   | 50pg M1186V RNA | 78 | 10 | 4 | 92  | NS | 0.9535 | + | <0.0001 |
| I1208S | X |   | 50pg I1208S RNA | 63 | 11 | 6 | 80  | NS | 0.1015 | + | <0.0001 |
| D1284H |   | X | 50pg D1284H RNA | 96 | 18 | 6 | 120 | NS | 0.5514 | + | <0.0001 |
| R1311G | X | X | 50pg R1311G RNA | 58 | 10 | 3 | 71  | NS | 0.8266 | + | <0.0001 |

\* indicates effect of test injection vs. WT mRNA or MO alone. "NS", not significantly different; "+," ameliorated phenotype

\*\* P-value for  $\chi^2$  test; <0.05 is considered significant



**Supplementary Table 5. Morphometric measurements of embryos labeled *in situ* with *krox20*, *pax2*, and *myoD***

| <i>TTC21B</i> Variant | Injection                 | W/L ratio |       |         | versus WT rescue | versus MO alone | Pathogenicity |
|-----------------------|---------------------------|-----------|-------|---------|------------------|-----------------|---------------|
|                       |                           | n=        | Mean  | St. Dev | P-val            | P-val           |               |
|                       | Controls                  | 10        | 0.164 | 0.014   |                  |                 |               |
|                       | 10ng MO                   | 10        | 0.214 | 0.034   |                  |                 |               |
| WT                    | 10ng MO + 50pg WT RNA     | 10        | 0.169 | 0.028   |                  |                 |               |
| K157E                 | 10ng MO + 50pg K157E RNA  | 9         | 0.184 | 0.017   | 0.0905           | 0.014           | benign        |
| P209L                 | 10ng MO + 50pg P209L RNA  | 7         | 0.189 | 0.018   | 0.0500           | 0.049           | pathogenic    |
| Q222L                 | 10ng MO + 50pg Q222L RNA  | 9         | 0.193 | 0.019   | <0.0001          | 0.054           | pathogenic    |
| T231S                 | 10ng MO + 50pg T231S RNA  | 9         | 0.229 | 0.060   | 0.0058           | 0.263           | pathogenic    |
| Y255C                 | 10ng MO + 50pg Y255C RNA  | 9         | 0.266 | 0.088   | 0.0020           | 0.051           | pathogenic    |
| M280V                 | 10ng MO + 50pg M280V RNA  | 10        | 0.200 | 0.066   | 0.0008           | 0.278           | pathogenic    |
| A327S                 | 10ng MO + 50pg A327S RNA  | 9         | 0.193 | 0.022   | 0.0250           | 0.068           | pathogenic    |
| Y347C                 | 10ng MO + 50pg Y347C RNA  | 10        | 0.205 | 0.026   | 0.0036           | 0.249           | pathogenic    |
| R411G                 | 10ng MO + 50pg R411G RNA  | 10        | 0.212 | 0.019   | 0.0004           | 0.415           | pathogenic    |
| S591N                 | 10ng MO + 50pg S591N RNA  | 10        | 0.207 | 0.020   | 0.0012           | 0.285           | pathogenic    |
| P753L                 | 10ng MO + 50pg P753L RNA  | 9         | 0.276 | 0.108   | 0.0038           | 0.052           | pathogenic    |
| L795P                 | 10ng MO + 50pg L795P RNA  | 10        | 0.198 | 0.017   | 0.0059           | 0.088           | pathogenic    |
| R939W                 | 10ng MO + 50pg R939W RNA  | 9         | 0.215 | 0.062   | 0.0240           | 0.484           | pathogenic    |
| T1103R                | 10ng MO + 50pg T1103R RNA | 10        | 0.206 | 0.015   | 0.0007           | 0.244           | pathogenic    |
| I1208S                | 10ng MO + 50pg I1208S RNA | 10        | 0.226 | 0.053   | 0.0039           | 0.286           | pathogenic    |

**Supplementary Table 6. Cilia length measurements for *in vitro* complementation assays in IMCD3-*Ttc21b* shRNA cells.**

| <i>TTC21B</i> Variant | Cell line                   | Cilia length (mm) |      |         | versus WT rescue | versus shRNA alone | Pathogenicity |
|-----------------------|-----------------------------|-------------------|------|---------|------------------|--------------------|---------------|
|                       |                             | n=                | Mean | St. Dev | P-val            | P-val              |               |
|                       | IMCD3-EV                    | 102               | 4.08 | 1.04    |                  |                    |               |
|                       | IMCD3- <i>Ttc21b</i> -shRNA | 104               | 2.07 | 0.69    |                  |                    |               |
| WT                    | IMCD3- <i>Ttc21b</i> -shRNA | 96                | 4.10 | 1.65    |                  |                    |               |
| K157E                 | IMCD3- <i>Ttc21b</i> -shRNA | 122               | 2.33 | 0.59    | <0.0001          | 0.0026             | hypomorph     |
| P209L                 | IMCD3- <i>Ttc21b</i> -shRNA | 90                | 2.45 | 0.91    | <0.0001          | 0.0011             | hypomorph     |
| Q222L                 | IMCD3- <i>Ttc21b</i> -shRNA | 122               | 2.58 | 0.82    | <0.0001          | <0.0001            | hypomorph     |
| T231S                 | IMCD3- <i>Ttc21b</i> -shRNA | 133               | 2.40 | 0.59    | <0.0001          | 0.0001             | hypomorph     |
| Y255C                 | IMCD3- <i>Ttc21b</i> -shRNA | 126               | 2.47 | 0.69    | <0.0001          | <0.0001            | hypomorph     |
| M280V                 | IMCD3- <i>Ttc21b</i> -shRNA | 131               | 2.03 | 0.52    | <0.0001          | 0.0454             | null          |
| A327S                 | IMCD3- <i>Ttc21b</i> -shRNA | 155               | 2.68 | 0.75    | <0.0001          | <0.0001            | hypomorph     |
| Y347C                 | IMCD3- <i>Ttc21b</i> -shRNA | 116               | 2.37 | 0.61    | <0.0001          | 0.0008             | hypomorph     |
| R411G                 | IMCD3- <i>Ttc21b</i> -shRNA | 102               | 2.45 | 0.87    | <0.0001          | 0.0006             | hypomorph     |
| S591N                 | IMCD3- <i>Ttc21b</i> -shRNA | 114               | 2.47 | 0.58    | <0.0001          | <0.0001            | hypomorph     |
| P753L                 | IMCD3- <i>Ttc21b</i> -shRNA | 135               | 2.02 | 0.49    | <0.0001          | 0.5452             | null          |
| L795P                 | IMCD3- <i>Ttc21b</i> -shRNA | 115               | 2.54 | 0.68    | <0.0001          | <0.0001            | hypomorph     |
| R939W                 | IMCD3- <i>Ttc21b</i> -shRNA | 114               | 2.09 | 0.62    | <0.0001          | 0.8241             | null          |
| L1002V                | IMCD3- <i>Ttc21b</i> -shRNA | 154               | 2.56 | 0.60    | <0.0001          | <0.0001            | hypomorph     |
| D1041N                | IMCD3- <i>Ttc21b</i> -shRNA | 117               | 2.54 | 0.70    | <0.0001          | <0.0001            | hypomorph     |
| T1103R                | IMCD3- <i>Ttc21b</i> -shRNA | 85                | 2.84 | 1.35    | <0.0001          | <0.0001            | hypomorph     |
| I1208S                | IMCD3- <i>Ttc21b</i> -shRNA | 89                | 2.05 | 0.74    | <0.0001          | 0.8555             | null          |

**Supplementary Table 7. Densitometry analysis of TTC21B variants transiently transfected and tested for protein levels by Western blot.**

| Variant | TTC21B-V5 | N <sup>+</sup> /K <sup>+</sup> -ATPase | TTC21B/<br>N <sup>+</sup> /K <sup>+</sup> ATPase | Normalized to WT | Effect     |
|---------|-----------|----------------------------------------|--------------------------------------------------|------------------|------------|
| WT      | 1.45      | 25.34                                  | 0.057                                            | 1                |            |
| K157E   | 0.03      | 17.61                                  | 0.002                                            | 0.030            | decrease   |
| P209L   | 0.30      | 23.48                                  | 0.013                                            | 0.203            | decrease   |
| Q222L   | 0.04      | 25.43                                  | 0.002                                            | 0.028            | decrease   |
| T231S   | 0.60      | 15.44                                  | 0.039                                            | 0.682            | decrease   |
| Y255C   | 0.24      | 20.26                                  | 0.012                                            | 0.208            | decrease   |
| M280V   | 0.76      | 19.38                                  | 0.039                                            | 0.688            | decrease   |
| A327S   | 0.94      | 27.14                                  | 0.035                                            | 0.489            | decrease   |
| Y347C   | 1.20      | 22.38                                  | 0.054                                            | 0.941            | normal     |
| R411G   | 0.98      | 26.74                                  | 0.037                                            | 0.582            | decrease   |
| S591N   | 0.31      | 13.91                                  | 0.022                                            | 0.391            | decrease   |
| P753L   | 1.76      | 16.10                                  | 0.109                                            | 1.918            | increase   |
| L795P   | 1.04      | 19.26                                  | 0.054                                            | 0.947            | normal     |
| R939W   | 0.37      | 21.10                                  | 0.018                                            | 0.308            | decrease   |
| L1002V  | 0.90      | 20.81                                  | 0.043                                            | 0.759            | decrease   |
| D1041N  | 1.79      | 19.55                                  | 0.092                                            | 1.606            | increase   |
| T1103R  | 1.78      | 25.14                                  | 0.071                                            | 1.124            | normal     |
| I1208S  | 0.01      | 24.00                                  | 0                                                | 0                | undetected |

Values expressed as arbitrary fluorescent units.

**Supplementary Table 8. Evolutionary conservation of TTC21B missense variants**

| TTC21B Variant | Cohort |       | Evolutionary conservation |     |     |     |     |      |     |     |     |     |     |     |     |     |     | Protein domains | ClustalW2 Conservation Score | BLOSUM62 Substitution Matrix Score | Overall pathogenicity |           |   |
|----------------|--------|-------|---------------------------|-----|-----|-----|-----|------|-----|-----|-----|-----|-----|-----|-----|-----|-----|-----------------|------------------------------|------------------------------------|-----------------------|-----------|---|
|                | Case   | Cntrl | Hsa                       | Mmu | Bta | Eca | Cfa | Mmus | Rno | Mdo | Oan | Gga | Tgu | Xla | Dre | Spu | Cel |                 |                              |                                    |                       | Cre       |   |
|                | F60Y   | X     |                           | F   | F   | F   | F   | F    | F   | F   | L   | L   | L   | L   | L   | L   | L   |                 |                              |                                    |                       | L         | L |
| K66R           |        | X     | K                         | K   | K   | K   | K   | K    | K   | K   | K   | K   | D   | R   | K   | D   | N   | 6               | 2                            | Benign                             |                       |           |   |
| W150R          | X      |       | W                         | W   | W   | W   | W   | W    | W   | W   | W   | W   | W   | W   | W   | W   | W   | 11              | -3                           | Null                               |                       |           |   |
| K157E          | X      |       | K                         | K   | K   | K   | K   | K    | K   | K   | K   | K   | K   | K   | R   | K   | Q   | 7               | 1                            | Hypomorph                          |                       |           |   |
| P209L          | X      |       | P                         | P   | P   | P   | P   | P    | P   | P   | P   | P   | P   | P   | P   | I   | G   | 5               | -3                           | Hypomorph                          |                       |           |   |
| Q222L          | X      | X     | Q                         | Q   | Q   | Q   | Q   | Q    | Q   | Q   | Q   | Q   | F   | L   | Q   | S   | L   | 4               | -2                           | Hypomorph                          |                       |           |   |
| T231S          | X      |       | T                         | T   | T   | T   | T   | T    | T   | T   | T   | A   | T   | T   | T   | V   | V   | 6               | 1                            | Hypomorph                          |                       |           |   |
| D242N          | X      | X     | D                         | D   | D   | D   | D   | D    | D   | N   | D   | D   | D   | E   | E   | E   | D   | 8               | 1                            | Benign                             |                       |           |   |
| Y255C          | X      |       | Y                         | Y   | Y   | Y   | Y   | Y    | Y   | H   | H   | H   | H   | H   | Q   | H   | I   | 4               | -2                           | Hypomorph                          |                       |           |   |
| M280V          | X      | X     | M                         | M   | V   | M   | M   | M    | M   | V   | L   | L   | A   | Q   | F   | N   | Q   | 3               | -2                           | Null                               |                       |           |   |
| A327S          | X      |       | A                         | A   | A   | A   | A   | A    | A   | A   | A   | A   | A   | A   | H   | A   | V   | TPR             | 3                            | 1                                  | Hypomorph             |           |   |
| Y347C          | X      |       | Y                         | Y   | Y   | Y   | Y   | Y    | Y   | Y   | Y   | Y   | Y   | Y   | Y   | S   | F   | TPR             | 5                            | -2                                 | Hypomorph             |           |   |
| R411G          | X      | X     | R                         | R   | R   | R   | P   | R    | R   | G   | R   | R   | E   | P   | P   | S   | -   | 0               | -2                           | Hypomorph                          |                       |           |   |
| Q412R          |        | X     | Q                         | Q   | Q   | Q   | R   | Q    | Q   | Q   | Q   | Q   | E   | P   | A   | F   | -   | 0               | 1                            | Benign                             |                       |           |   |
| D424E          |        | X     | D                         | D   | D   | D   | D   | N    | N   | D   | D   | D   | E   | D   | T   | E   | A   | 4               | 2                            | Benign                             |                       |           |   |
| H566R          | X      |       | H                         | H   | H   | H   | H   | H    | H   | H   | H   | H   | H   | H   | H   | H   | H   | TPR             | 11                           | 0                                  | Null                  |           |   |
| S591N          | X      |       | S                         | S   | S   | S   | S   | N    | N   | S   | S   | N   | N   | S   | S   | A   | Q   | N               | TPR                          | 5                                  | 1                     | Hypomorph |   |
| R616C          | X      | X     | R                         | R   | R   | R   | R   | R    | R   | R   | R   | R   | K   | C   | R   | K   | R   | 5               | -3                           | Benign                             |                       |           |   |
| I624V          |        | X     | I                         | I   | V   | V   | V   | V    | V   | V   | V   | V   | A   | A   | A   | I   | A   | 7               | 1                            | Benign                             |                       |           |   |
| H645R          |        | X     | H                         | H   | H   | H   | H   | H    | N   | N   | D   | N   | N   | N   | N   | A   | R   | 2               | 0                            | Benign                             |                       |           |   |
| S724T          | X      |       | S                         | S   | S   | S   | S   | S    | T   | T   | T   | T   | T   | T   | S   | T   | S   | S               | TPR                          | 9                                  | 1                     | Benign    |   |
| P753L          | X      | X     | P                         | P   | P   | P   | P   | P    | P   | P   | P   | P   | P   | P   | P   | S   | P   | TPR             | 7                            | -3                                 | Null                  |           |   |
| D755Y          | X      |       | D                         | D   | D   | D   | D   | D    | D   | D   | D   | D   | D   | D   | D   | D   | D   | TPR             | 11                           | -3                                 | Null                  |           |   |
| L795P          | X      |       | L                         | L   | L   | L   | L   | L    | L   | L   | L   | L   | L   | L   | L   | L   | L   | TPR             | 11                           | -3                                 | Hypomorph             |           |   |
| M844V          | X      |       | M                         | M   | V   | V   | M   | M    | M   | M   | M   | M   | Y   | V   | G   | M   | K   | TPR             | 3                            | -2                                 | Null                  |           |   |
| R867C          | X      |       | R                         | R   | R   | R   | R   | R    | R   | R   | R   | R   | R   | R   | R   | R   | K   | K               | 9                            | -3                                 | Null                  |           |   |
| R867H          | X      | X     | R                         | R   | R   | R   | R   | R    | R   | R   | R   | R   | R   | R   | R   | R   | K   | K               | 9                            | 0                                  | Null                  |           |   |
| Q869R          | X      |       | Q                         | L   | Q   | Q   | Q   | Q    | Q   | Q   | Q   | Q   | P   | Q   | Q   | L   | R   | 3               | 1                            | Hypomorph                          |                       |           |   |
| R939Q          |        | X     | R                         | R   | R   | R   | R   | R    | R   | R   | R   | H   | H   | N   | Q   | H   | Q   | A               | 3                            | 1                                  | Hypomorph             |           |   |
| R939W          |        | X     | R                         | R   | R   | R   | R   | R    | R   | R   | R   | H   | H   | N   | Q   | H   | Q   | A               | 3                            | -3                                 | Null                  |           |   |
| L1002V         | X      | X     | L                         | L   | L   | L   | L   | L    | L   | L   | L   | L   | L   | L   | L   | Q   | L   | 7               | 3                            | Hypomorph                          |                       |           |   |
| M1011V         |        | X     | M                         | M   | M   | M   | M   | M    | M   | M   | M   | M   | K   | M   | Q   | R   | L   | 5               | -2                           | Benign                             |                       |           |   |
| Y1035C         |        | X     | Y                         | Y   | Y   | Y   | Y   | Y    | Y   | Y   | Y   | Y   | Y   | Y   | Y   | Y   | Y   | 11              | -2                           | Benign                             |                       |           |   |
| D1041N         | X      |       | D                         | D   | D   | D   | D   | D    | D   | D   | D   | D   | D   | D   | L   | E   | E   | 4               | 1                            | Null                               |                       |           |   |
| T1103R         | X      |       | T                         | T   | T   | T   | T   | T    | T   | T   | T   | T   | T   | T   | T   | K   | T   | 6               | -1                           | Hypomorph                          |                       |           |   |
| Y1167C         | X      |       | Y                         | Y   | H   | Y   | Y   | Y    | Y   | F   | F   | Y   | Y   | Y   | Y   | H   | F   | 7               | -2                           | Hypomorph                          |                       |           |   |
| M1186V         | X      |       | M                         | M   | M   | M   | M   | M    | M   | M   | M   | M   | V   | M   | M   | R   | I   | 4               | -2                           | Hypomorph                          |                       |           |   |
| I1208S         | X      |       | I                         | I   | I   | I   | I   | I    | I   | I   | I   | I   | I   | I   | I   | I   | I   | TPR             | 11                           | -2                                 | Null                  |           |   |
| D1284H         |        | X     | D                         | D   | D   | D   | D   | D    | D   | D   | N   | D   | D   | D   | D   | A   | E   | TPR             | 4                            | -1                                 | Hypomorph             |           |   |

|                        |   |   |   |   |   |   |   |   |   |   |   |   |   |   |   |   |   |   |    |        |        |
|------------------------|---|---|---|---|---|---|---|---|---|---|---|---|---|---|---|---|---|---|----|--------|--------|
| R1311G                 | X | X | R | R | R | R | R | R | R | R | C | R | H | Q | R | R | K | R | 4  | -2     | Benign |
| <i>HapMap Variants</i> |   |   |   |   |   |   |   |   |   |   |   |   |   |   |   |   |   |   |    |        |        |
| V201M (rs1432273)      | X | X | V | V | V | V | V | V | V | V | V | V | V | I | I | I | A | L | 7  | 1      | Benign |
| T276A (rs7592429)      | X | X | T | A | A | A | A | A | A | T | A | A | A | A | N | L | S | S | 4  | -1     | Benign |
| P463S (rs16851307)     | X | X | P | P | P | P | P | P | P | P | P | P | P | S | P | P | P | 7 | -1 | Benign |        |
| L473F (rs2163649)      | X | X | L | L | L | L | L | V | V | L | L | L | L | L | Q | A | C | L | 5  | 0      | Benign |

Evolutionary conservation species abbreviated as follows: Hsa, H. Sapiens; Mmul, M. mulatta; Bta, B. taurus; Eca, E. caballus; Cfa, C. familiaris; Mmus, M. musculus; Rno, R. norvegicus; Mdo, M. domesticus; Oan, O. anatinus; Gga, G. gallus; Tgu, T. guttata; Xla, X. laevis; Dre, D. rerio; Spu, S. purpuratus; Cel, C. elegans; Cre, C. reinhardtii. Nucleotides indicated in yellow or gray; Amino acids coded for AVFPMILW (red), small (small+ hydrophobic (including aromatic -Y)); DE (blue), acidic; RK (magenta), basic; STYHCNGQ (green), hydroxyl + amine + basic – Q. Domains: TPR, tetratricopeptide repeat.

**Supplementary Table 9. Haplotype analysis of *TTC21B* P209L homozygotes**

| <i>TTC21B</i><br>Exon | SNP<br>ID  | Genomic<br>coordinate | Genotype   |           |
|-----------------------|------------|-----------------------|------------|-----------|
|                       |            |                       | A3214-III1 | F623-III1 |
| 2                     | rs34486024 | chr2:166,806,142      | C/C        | C/C       |
| 6                     | rs1432273  | chr2:166,797,646      | A/A        | A/A       |
| 8                     | rs7592429  | chr2:166,788,336      | G/G        | G/G       |
| 10                    | rs62177816 | chr2:166,786,137      | C/C        | C/C       |
| 12                    | rs16851307 | chr2:166,781,188      | C/C        | C/C       |
| 12                    | rs2163649  | chr2:166,781,158      | C/C        | C/C       |
| 14                    | rs6750044  | chr2:166,773,971      | C/C        | C/C       |
| 15                    | rs16822802 | chr2:166,771,884      | G/G        | G/G       |
| 15                    | rs7590559  | chr2:166,771,663      | G/G        | G/G       |
| 16                    | rs10176588 | chr2:166,770,120      | T/T        | T/T       |
| 16                    | rs73969727 | chr2:166,770,071      | A/A        | A/A       |
| 20                    | rs7595100  | chr2:166,764,281      | C/C        | C/C       |
| 20                    | rs7595010  | chr2:166,764,219      | C/C        | C/C       |
| 24                    | rs34925776 | chr2:166,747,029      | G/G        | G/G       |
| 26                    | rs3749031  | chr2:166,740,323      | G/G        | G/G       |
| 27                    | rs71426786 | chr2:166,737,306      | T/T        | T/T       |

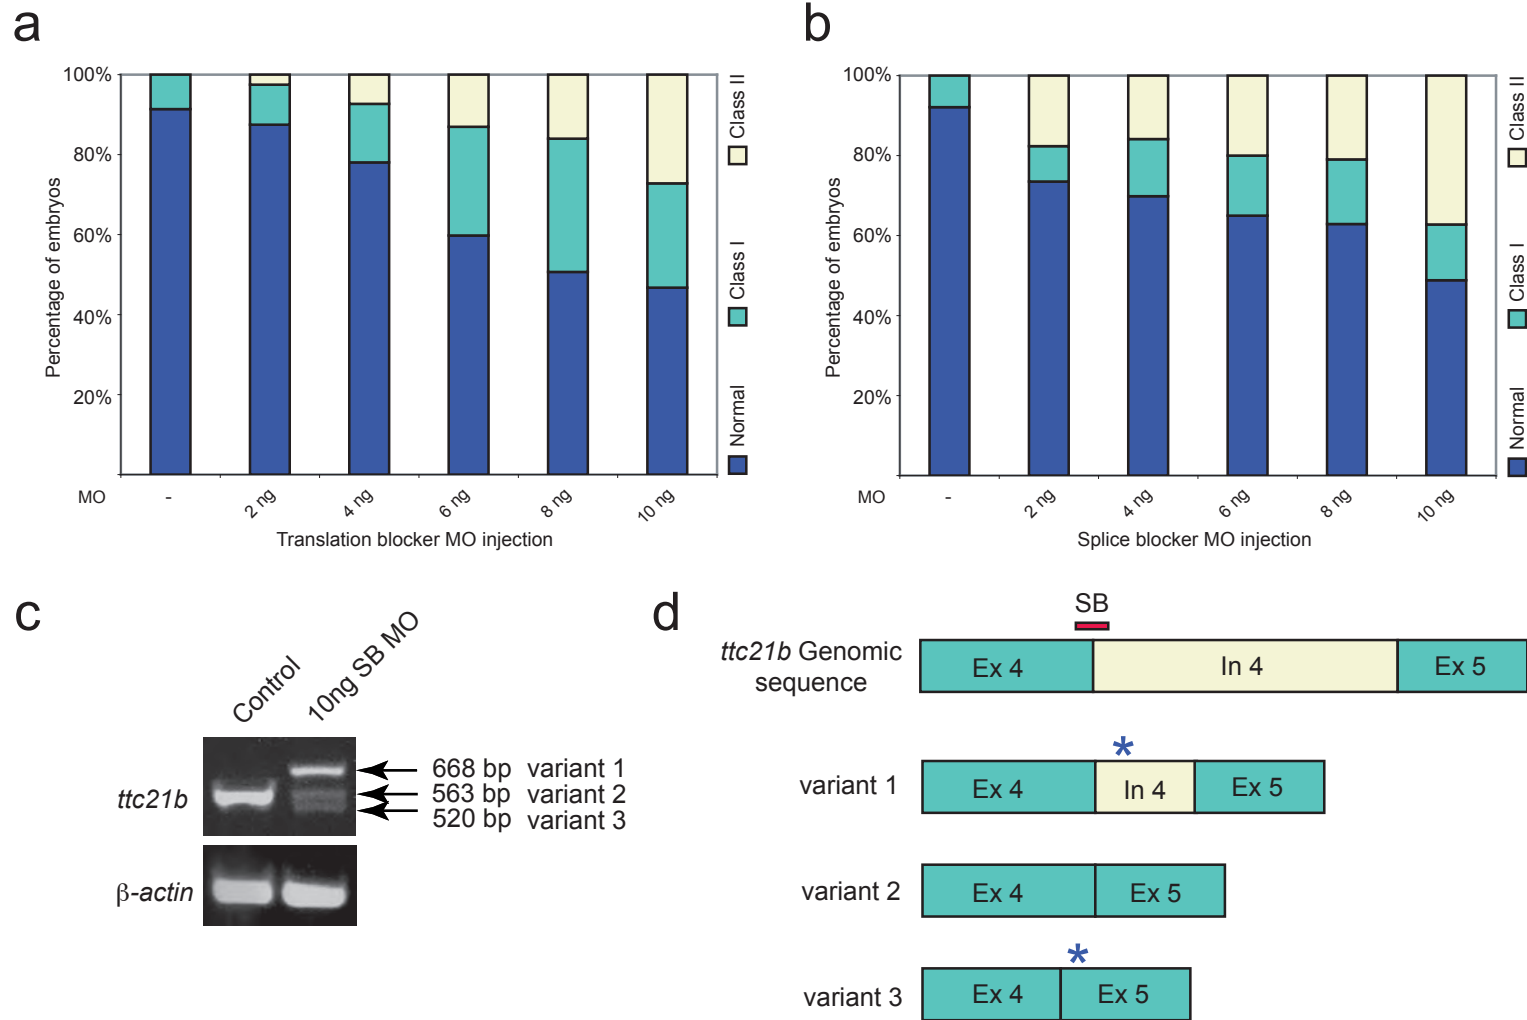

**Supplementary Figure 1.** Characterization of *ttc21b* morpholinos. **(a)** Dose response curve for *ttc21b* translation-blocking (tb) morpholino (MO). Wild type zebrafish embryos were injected at the two-cell stage with increasing concentrations of tb-MO (2ng, 4ng, 6ng, 8ng, and 10ng) and scored at the 9-10 somite stage for gastrulation defects. Class I, shortened embryonic body axis with small head/eye and mild somite defects; Class II, severely shortened anterior-posterior axis, severely affected anterior structures, broadening and kinking of the notochord, thinning and widening of the somites, and tail extension defects. **(b)** Dose response curve for *ttc21b* splice-blocking (sb) morpholino (MO); injection concentrations and phenotypic criteria are described in (a). Both *ttc21b* tb and sb MOs give rise to similar phenotypic dose responses. **(c)** Determination of *ttc21b* sb-MO efficiency. Total RNA was extracted from whole embryos at the 10-somite stage and oligo dT primed cDNA was generated by reverse transcription. Subsequent PCR of zebrafish *ttc21b* and agarose gel electrophoresis resulted in three different amplification products in morphant embryos; variant 1, 668bp, results in a premature termination codon (PTC); variant 2, 563bp, represents the correctly spliced transcript; variant 3, 520bp, results in a PTC. **(d)** Schematic of the amplification products produced by the *ttc21b* sb-MO. SB, splice-blocking MO targeting the splice acceptor of exon 4; Ex, exon; In, intron; blue asterisks indicate PTCs.

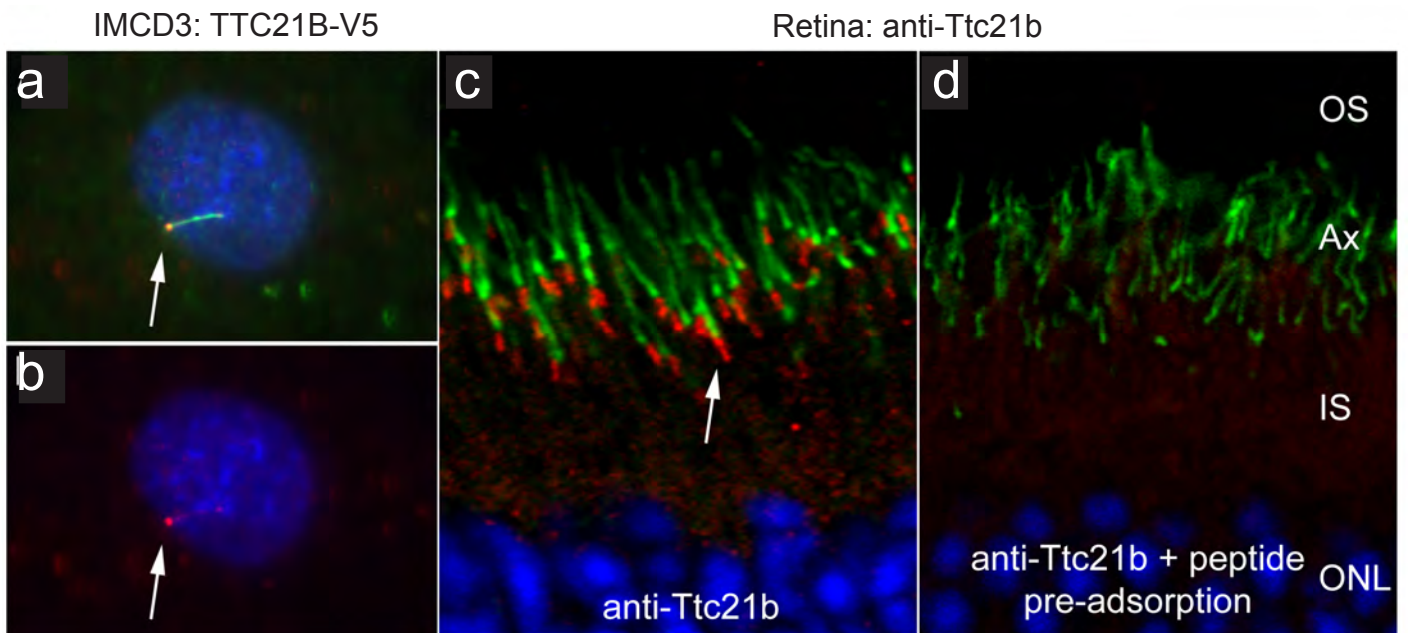

**Supplementary Figure 2.** Localization of endogenous and V5-tagged TTC21B in mIMCD3 cells and retina. (a-b) Transiently transfected V5-tagged TTC21B (red, arrow) is located at the base of cilia in transfected mIMCD3 cells that stably express the ciliary marker Sstr3-EGFP (green) (a, merged image; b, V5 only). A faint TTC21B signal is also detected along the axoneme of the cilium. (c) Antibodies to Ttc21b (red) show that the protein is localized to the transition zone of rodent photoreceptor sensory cilia (PSC; arrow). The axonemes of PSCs are shown by staining with antibodies to Rp1 (green). (d) Pre-adsorption of the anti-Ttc21b antibodies with peptide demonstrates the specificity of Ttc21b signal. Blue, nuclei; Ax, axoneme; IS, inner segment; ONL, outer nuclear layer; OS outer segment.



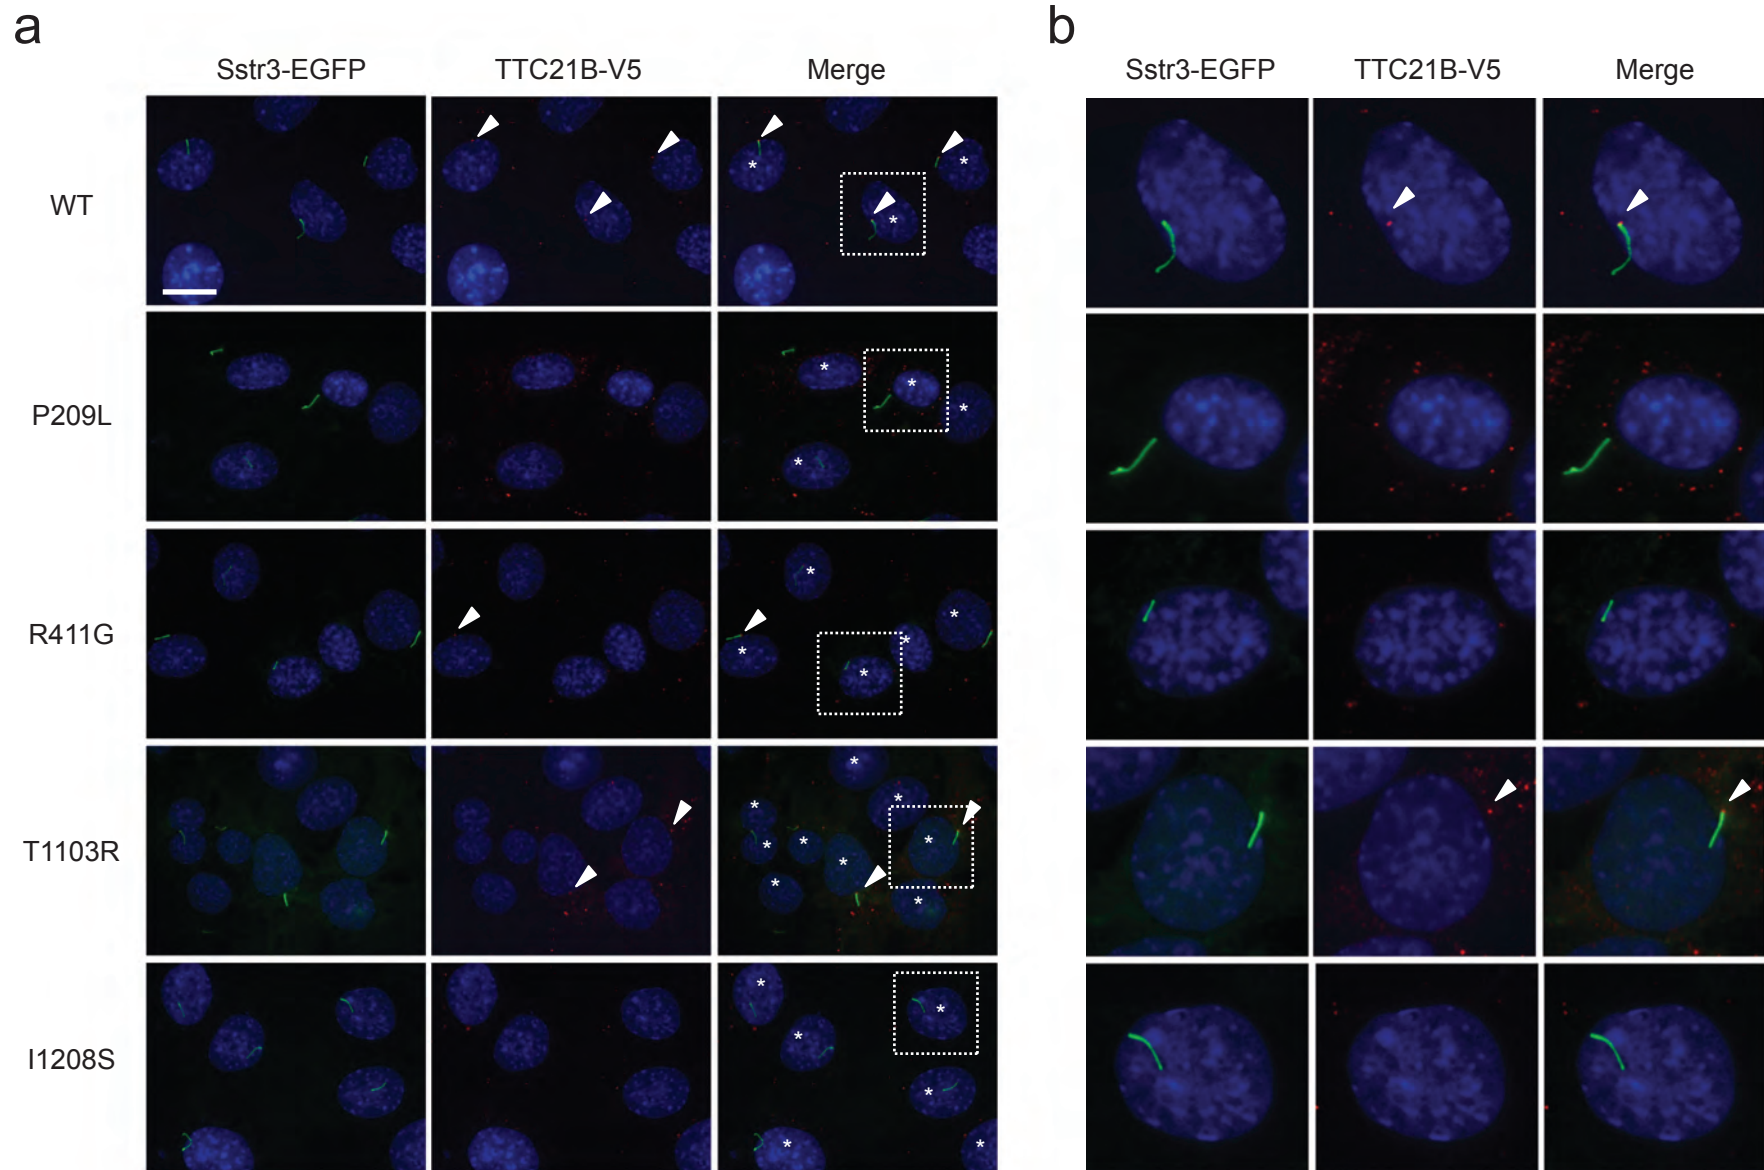

**Supplementary Figure 3.** *In vitro* analysis of V5-tagged TTC21B protein in ciliated mIMCD3 cells. Immunofluorescent staining of mIMCD3-Sstr3-EGFP cells transfected transiently with plasmids encoding wild-type (WT) or mutant versions of TTC21B cDNA demonstrate mislocalization of mutant proteins. **(a)** Tagged proteins were detected using anti-V5 antibody (red), Sstr3-EGFP signal demarcates primary cilia (green), and nuclei are stained with Hoechst dye (blue). WT TTC21B -V5 localizes primarily to the basal body and also to the cilium, however some mutants show mislocalization in >70% of cells scored (P209L, R411G, T1103R), or are undetected in this assay (I1208S; 50-70 transfected cells scored per construct). White arrows indicate localization of tagged protein to the base of the cilium; \*, transfected cells; scale bar 10 $\mu$ m. **(b)** Magnified images of single cells in panel (a) are shown to demonstrate mislocalization of mutant proteins in comparison to the basal body localization of WT TTC21B -V5. Panel origin is boxed with dashed lines in Merged views of panel (a).

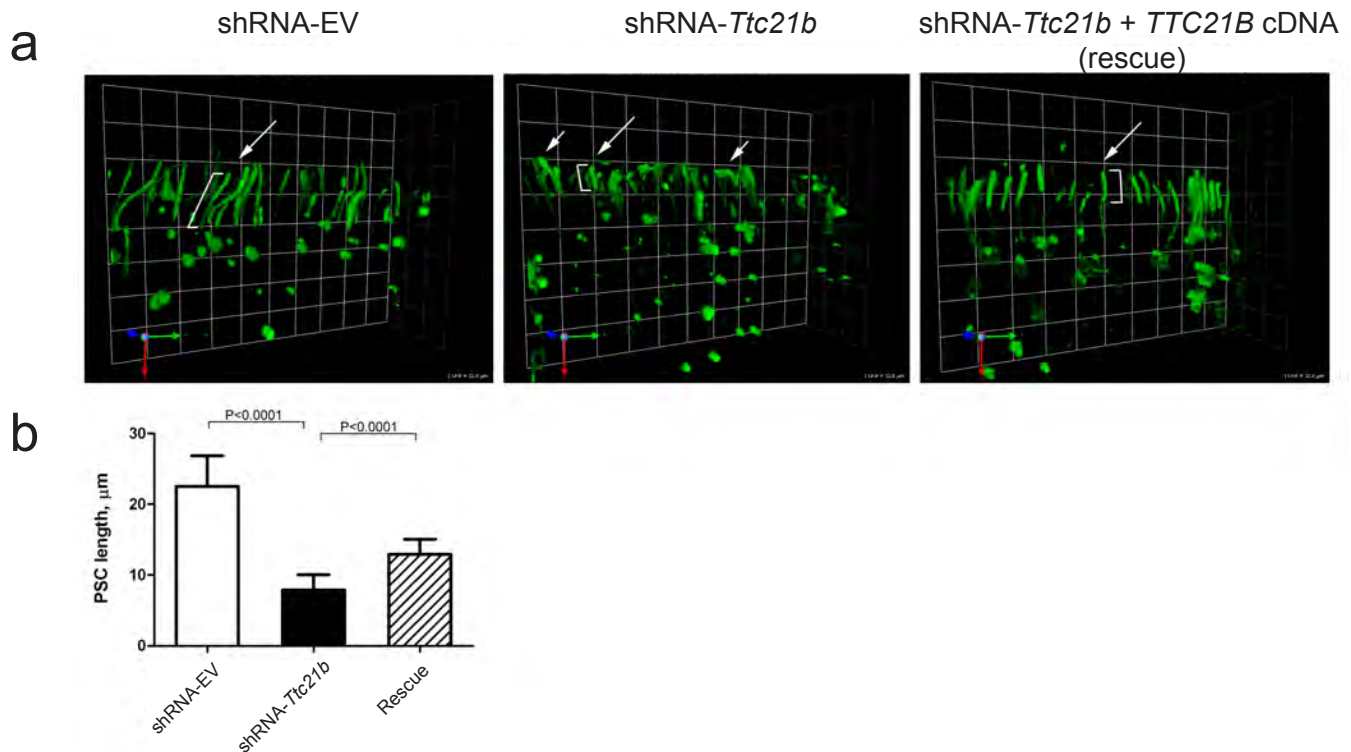

**Supplementary Figure 4.** *Ttc21b* is required for normal photoreceptor sensory cilia (PSC) formation (a) Photoreceptor cells in neonatal rat retinas were transfected via *in vivo* electroporation with shRNA-EV (empty vector; left panel), shRNA-*Ttc21b* (2923) (center panel), or shRNA-*Ttc21b* plus shRNA-resistant *TTC21B* cDNA (right panel). A plasmid encoding arrestin-EGFP was included in all transfections to demonstrate PSC structure. Suppression of *Ttc21b* expression results in shortened, abnormally shaped PSCs (small arrows indicate examples). shRNA-resistant *TTC21B* partially rescues PSC length and structure. Images are 3D reconstructions of confocal image stacks; the grids are included to show perspective; in each image, grid size is 12.8  $\mu\text{m}$ . (b) PSC length was measured using Volocity Quantitation software; mean  $\pm$  SD are shown. Long arrows in a. show example PSCs measured (white brackets). ONL, outer nuclear layer; OS, outer segment.
